1 **Title:** Asymmetric migration decreases stability but increases resilience in a  
2 heterogeneous metacommunity

3  
4 **Authors:** Anurag Limdi<sup>1†</sup>, Alfonso Pérez-Escudero<sup>1†</sup>, Aming Li<sup>1,2,3</sup>, Jeff Gore<sup>1\*</sup>

5 **Affiliations:**

6 <sup>1</sup> Physics of Living Systems, Department of Physics, Massachusetts Institute of Technology,  
7 Cambridge, MA 02139.

8 <sup>2</sup> Center for Systems and Control, College of Engineering, Peking University, Beijing 100871,  
9 China.

10 <sup>3</sup> Center for Complex Network Research and Department of Physics, Northeastern University,  
11 Boston, MA 02115, USA.

12

13 \* Correspondence to: gore@mit.edu

14 † Equal contribution

15

16 **Abstract:** Many natural communities are spatially distributed, forming a network of  
17 subcommunities linked by migration. Migration patterns are often asymmetric and  
18 heterogeneous, with important consequences on the ecology and evolution of the species. Here  
19 we investigated experimentally how asymmetric migration and heterogeneous structure affect a  
20 simple metacommunity of budding yeast, formed by one strain that produces a public good and a  
21 non-producer strain that benefits from it. We find that asymmetric migration increases the  
22 fraction of producers in all subpopulations of the metacommunity. Furthermore, asymmetric  
23 migration decreases the metacommunity's tolerance to challenging environments, but increases  
24 its resilience to transient perturbations. This apparent paradox occurs because tolerance to a  
25 constant challenge depends on the weakest subpopulations of the network, while resilience to a  
26 transient perturbation depends on the strongest ones.

27

28 **One Sentence Summary:** Asymmetric migration decreases the stability of experimental yeast  
29 metacommunities but increases their resilience to transient shocks.

30

31

32 **Main Text:**

33  
34 Natural populations are spatially distributed, often in a way in which neighboring populations are  
35 linked to each other by migration. These complex populations are called metapopulations (1–6)  
36 or, when they contain several coexisting species, metacommunities (7, 8). Natural  
37 metacommunities often have heterogeneous connectivity (some subpopulations have more  
38 neighbors than others) and asymmetric migration patterns (the net flow of individuals between  
39 any two subpopulations can be non-zero). Extreme examples are dendritic networks, in which  
40 several nodes of each level connect to a single node in the next one (9). For example, river basins  
41 give rise to dendritic metacommunities, with all tributaries being connected to their parent river  
42 (and with highly asymmetric migration due to water currents) (9–15). Besides dendritic  
43 networks, many natural metacommunities have heterogeneous connectivity and asymmetric  
44 migration patterns (16, 17).

45 A major challenge is understanding how the structure of metacommunities influences the  
46 ecology and evolution of the involved species. Spatial structure usually increases the biodiversity  
47 of metacommunities (8, 18–23), and may enhance particular interactions such as cooperation  
48 (24–26). It may also have profound effects on the ability of a species to survive environmental  
49 deterioration and transient perturbations. This question has been studied extensively, especially  
50 for metapopulations but also for metacommunities (20, 27–33). Given the complexity of these  
51 systems, results are mixed: Depending on the conditions, spatial structure may increase (20, 27–  
52 30) or decrease (29–32) the system’s ability to survive in a challenging environment. Results  
53 from stability theory in dynamical systems may help identify the main factors determining each  
54 outcome (34). For example, well-mixed populations and communities have been shown to cross  
55 a tipping point as the environment deteriorates, leading to a sudden collapse of the population  
56 rather than a smooth decline towards extinction (35–37). This detailed understanding allows  
57 predicting how different factors affect the stability of the populations, and has also helped to  
58 demonstrate that generic indicators such as critical slowing down can predict the collapse of the  
59 system (34, 35, 37–39). Extending this approach to metacommunities requires taking into  
60 account the effect of migration on the density of the subpopulations. This effect is often  
61 neglected, as the most studied effect of migration is to propagate species to locations where they  
62 are not present (5, 6, 40–42). Yet in many cases migration may be strong enough to have a

63 significant effect in the density of the subpopulations—the so-called mass effects (7, 43)—,  
64 which in turn may determine their survival and composition (via density-dependent selection).

65 We addressed these questions experimentally taking advantage of the high-throughput and short  
66 generation times of microbial microcosms, which allow us to study metacommunities over  
67 hundreds of generations. We chose a simple community formed by two strains of budding yeast  
68 (*Saccharomyces cerevisiae*) growing on sucrose. These cells cannot metabolize sucrose directly;  
69 one of the strains (the producer) produces an enzyme that breaks down sucrose into glucose and  
70 fructose, which can be metabolized by the cells. This reaction does not take place inside the cell,  
71 but in the periplasmic space between the cell membrane and the cell wall, so most of the  
72 products (~99%) diffuse away, acting as a public good that can be used by any nearby cell. Cells  
73 that do not produce the enzyme can benefit from the public good without paying the cost of  
74 producing it (**Fig 1A**) (44, 45). This simple community therefore contains three important  
75 interactions: cooperation among individuals of the producer strain, facilitation between the  
76 producer strain and the non-producer one, and competition for resources. Also, the production of  
77 a public good gives rise to an Allee effect (i.e. the growth rate of the population is higher at  
78 intermediate densities than at low densities, due to the accumulation of public good). Because of  
79 this Allee effect, the population size does not diminish smoothly when conditions deteriorate, but  
80 undergoes a catastrophic collapse when the density of producers falls below a critical threshold  
81 (35, 36). This sudden collapse makes our experimental system ideal to study the stability of the  
82 metacommunity.

83 Additionally, this system presents both frequency- and density-dependent selection. When the  
84 population contains enough producers to make the public good plentiful, non-producers have the  
85 advantage of not paying the production cost, so they will increase in frequency. However, if too  
86 few producers are present the public good will be so scarce that the small amount imported by  
87 producers before it diffuses away will allow them to grow faster than the non-producers. These  
88 two effects create negative frequency-dependent selection, in which each strain is at a  
89 disadvantage when too frequent, and the population tends toward an intermediate fraction of both  
90 strains (**Fig. 1A, left inset**) (44, 46). This equilibrium fraction of producers in turn depends on  
91 the overall density of the population, giving rise to density-dependent selection: the same  
92 fraction of producers in a denser population entails more producer cells, hence more public good

93 and greater advantage for the non-producers. Therefore, the equilibrium fraction of producers is  
94 lower in denser populations (**Fig. 1A, right inset**)(36).

95 This density-dependent selection may have important consequences in metacommunities,  
96 because asymmetric migration may lead to unequal densities in different nodes, and hence  
97 unequal fractions of producers. To study this effect, we compared isolated well-mixed  
98 communities to metacommunities with heterogeneous connectivity, in which a central node is  
99 connected to 9 side nodes (star network in **Fig. 1B**). As a control, we also tested  
100 metacommunities with homogeneous connectivity and symmetric migration (fully connected  
101 networks in **Fig. 1B**). In every time step, a fraction  $m$  of the cells in each node migrate to  
102 neighboring nodes, distributing evenly among them (**Fig. 1B**) (47). This fraction  $m$  of migrants is  
103 independent of the number of neighboring nodes, as is for example the case for organisms with a  
104 specialized dispersal stage. This migration scheme leads to asymmetric migration in  
105 heterogeneous networks, because the proportion of migrants traversing a link in each direction  
106 depends on the degree of the two connected nodes, with net migration flowing from the less  
107 connected to the most connected one (**Fig. 1B, center**). In the star network, net migration flows  
108 from the side nodes towards the center, which should lead to lower density on the sides and  
109 higher in the center, and therefore an increased fraction of producers in the sides and decreased  
110 in the center.

111 To determine how heterogeneous networks affect the frequency of producers in the  
112 metacommunity, we performed experiments comparing isolated nodes, 10-node star networks,  
113 and 10-node fully-connected networks. All populations underwent a daily dilution-migration-  
114 growth procedure: At the beginning of each day, all cultures were diluted in fresh medium by a  
115 factor 650. A fraction  $m$  of the remaining cells in each node then migrated to neighboring nodes,  
116 distributing uniformly among them (**Fig. 1B**). The cells then grew for 23 hours, until the next  
117 dilution-migration step. We chose a migration rate  $m=0.6$ , which corresponds to around 6% per  
118 generation (cells undergo around 10 generations in every growth cycle).

119 We found that network heterogeneity increases the overall fraction of producers. Regardless of  
120 the initial fraction, isolated populations and fully connected networks converge to having around  
121 8% producers, while star networks show a two-fold increase over this value (**Fig. 1C**).

122 Heterogeneous metacommunity structure therefore favors the public-goods producers in this  
123 system.

124 Furthermore, producer fraction increased in all nodes of the heterogeneous networks, including  
125 the central one (**Fig. 2A**). As predicted, migration in the star network resulted in lower density  
126 for the side nodes and higher density for the central node, as compared to isolated populations  
127 (**Fig. 2B**). Yet both side and central nodes showed an increased fraction of producers (**Fig. 2A**).  
128 This increase in producer fraction is expected for the side nodes, as they experience a higher  
129 effective dilution rate due to asymmetric migration, thus leading to a decrease in cell density that  
130 favors producers due to the density-dependent selection (**Fig. 1A**). In contrast, the increased  
131 density in the central node should produce a decrease in the fraction of producers, as is indeed  
132 the case at the beginning of the experiment (**Fig. 2A**, days 1-5). However, the central node  
133 receives a large number of migrants from the side nodes. Therefore, once the fraction of  
134 producers in the side nodes is high enough, immigration into the central node increases its  
135 fraction of producers in spite of its high cell density. The heterogeneous network structure in our  
136 star network therefore increases the producer fraction in all nodes throughout the network.

137 To further understand these effects, we built a simple phenomenological model that incorporates  
138 negative frequency-dependent selection and density dependent selection. In this model, both  
139 strains grow logistically up to a common carrying capacity  $K$ . Their growth rates increase with  
140 the amount of available public good, which we assume to be proportional to the density of  
141 producers ( $N_p$ ). We assumed Michaelis-Menten dynamics for this increase, with  $k_M$  being the  
142 density of producers needed to produce enough public good to bring growth rate to half its  
143 maximum value. Because of the small fraction of sugars imported directly by producers, they  
144 benefit from an extra quantity  $\varepsilon$  of public good (44). Finally, producers pay a small cost  $c$  for  
145 producing the public good (**Fig. 2C**). We used this model to simulate daily growth followed by  
146 650x dilution and migration. This simple model successfully reproduces the increase in producer  
147 fraction that we observed experimentally (**Fig. 2D,E**).

148 This phenomenological model also predicts the impact of heterogeneous structure on the  
149 metacommunity's stability in the face of deteriorating environments. In isolated populations,  
150 increasing the daily dilution factor eventually leads to a catastrophic collapse of the population

151 (35, 36). Our model predicts that migration in the star network will favor this collapse, which  
152 will occur with milder dilution rates when migration rate is higher (**Fig. 3A**). This anticipated  
153 collapse happens because the lower density of the side nodes makes them incapable of sustaining  
154 the combined burden of dilution and net outward migration. Once the side nodes have collapsed,  
155 the central node receives no inward flux yet still has an outward flux of migrants, thus causing  
156 the central node to go extinct soon thereafter. Our model therefore predicts that heterogeneous  
157 metacommunities will go extinct in milder environmental conditions than isolated populations,  
158 despite the higher producer fraction present in the heterogeneous network.

159 To experimentally test this prediction of premature collapse, we compared the survival ability of  
160 isolated populations with that of the 10-node star networks over daily dilution factors from 400 to  
161 2000. As predicted by the model, star networks collapse at lower dilution rates (**Fig 3B**). For  
162 example, at a dilution rate of 1300 all four isolated populations survived, whereas none of the  
163 three star networks survived (**Fig 3B**, inset). Therefore, isolated populations are better able to  
164 survive challenging environments than populations connected in a heterogeneous network.

165 Previous reports have shown that a system close to a catastrophic collapse is less capable of  
166 recovering from harmful shocks (35, 36, 38, 46). In line with this, one would expect  
167 heterogeneous networks to be less likely to recover from perturbations than isolated populations,  
168 since for a given dilution rate the heterogeneous networks are closer to the tipping point. We  
169 investigated this prediction with the model, finding that it is only fulfilled in the immediate  
170 vicinity of the heterogeneous network's tipping point. For most conditions, asymmetric  
171 migration increases the resilience of the metacommunity to a transient shock (in particular a  
172 transient decrease in population density) (**Fig. 4A**). To test whether this result depends on the  
173 nature of the perturbation, we investigated the metacommunity's resilience to both dilution  
174 shocks and growth rate shocks (i.e. decreasing the growth rate during one cycle). In both cases,  
175 we find higher resilience for star networks than for isolated nodes (**Fig. 4B**).

176 We tested experimentally this counterintuitive prediction of higher resilience in the  
177 metacommunity, by subjecting yeast populations to a growth-inhibiting high-salt environment  
178 (32 g/L) during one day. As predicted by the model, all three heterogeneous networks recovered  
179 after the shock, while four of the five isolated populations went extinct (**Fig. 4C**). We therefore

180 find that, despite being less able to survive sustained exposure to challenging environments,  
181 heterogeneous networks are more resilient to transient environmental perturbations.

182 The surprising resilience of our star network is due to the increase in both density and producer  
183 fraction at the central node, which combine to increase the total number of producers present in  
184 the population. The salt shock leads to a smaller population in every node, which could take the  
185 density of producers below the threshold required for population survival. The increased number  
186 of producers allows the central node to survive perturbations that would drive isolated  
187 populations extinct. The side nodes of the network are not so resilient (because of their lower  
188 density), but they can be reseeded from the central node once the shock is over (**Fig 4D**; note that  
189 the density of the central node still decreases during the first cycle after the shock, as a  
190 consequence of the outbound migration which is reseeding the side nodes, which is not yet  
191 compensated by any significant influx from them).

192 These results highlight that stability and resilience may be determined by different factors in a  
193 complex system. In our heterogeneous metacommunities, stability depends on the weakest  
194 elements of the system—the side nodes—while resilience depends on the strongest one.

195 Our findings are a direct consequence of density-dependent selection, which is often linked to  
196 frequency-dependent selection but not equivalent to it. In the absence of density dependence, our  
197 system would have the same equilibrium producer fraction across the whole network, regardless  
198 of its topology and migration scheme. Many systems subject to frequency-dependent selection  
199 also exhibit density-dependent selection, yet this effect is often neglected in theoretical models  
200 (for example the replicator equation (48), which only considers fractions). Our results therefore  
201 highlight the important consequences of feedback between ecological and evolutionary dynamics  
202 in spatially distributed populations.

203 Our migration scheme links asymmetric migration with heterogeneous connectivity, because the  
204 proportion  $m$  of outgoing migrants does not depend on the number of neighbors of their home  
205 node. This would be true for example for organisms with an specialized dispersal stage.  
206 However, migration patterns may differ across species. An opposite assumption would be that  
207 flux between two nodes is symmetric regardless of the connectivity. Many natural systems will  
208 probably be between these two extremes, and as long as heterogeneous connectivity produces



209 some degree of asymmetric migration our qualitative results will be relevant. Future work that  
210 investigates alternative migration schemes will help disentangle the relative contributions of  
211 asymmetric migration and heterogeneous connectivity.

212 The seemingly paradoxical result of lower distance to the tipping point but higher resilience to  
213 transient perturbations may be a common feature of asymmetry in networked systems: collapse  
214 in steady state is dictated by the weaker elements, while resilience to transient perturbations is  
215 dictated by the stronger ones. This is especially important given the pervasiveness of  
216 heterogeneous networks (such as scale-free networks) in nature, and may have parallels in other  
217 complex systems such as power grids or human populations (49).

218

## 219 **Materials and Methods**

### 220 Strains

221 Both strain derive from haploid cells BY4741 (mating type a, EUROSCARF). The producer  
222 strain, JG300B (44), has a wild-type SUC2 gene, and can therefore produce invertase for the  
223 breakdown of sucrose. It has a mutated HIS3 gene (*his3ΔI*), therefore being a histidine  
224 auxotroph. It also expresses YFP constitutively. The non-producer strain, JG210C (44), has a  
225 deletion of the SUC2 gene, so it does not produce invertase. It has a wild-type HIS3 gene and  
226 expresses dTomato constitutively.

227

### 228 Culture conditions

229 Before every experiment, we picked a single colony of each cell type from a YPD agar  
230 plate<sup>1</sup>, and cultured it in 5 mL of YNB+Nitrogen<sup>2</sup> + CSM-his<sup>3</sup> supplemented with 2% glucose<sup>4</sup>  
231 and 8 μg/mL histidine<sup>5</sup> in a 50-mL Falcon tube at 30C and 50% humidity with shaking at 250  
232 rpm for 24 hours. We then mixed the two strains at different fractions and diluted them x100 in  
233 YNB+Nitrogen + CSM-his supplemented with 2% sucrose<sup>6</sup>, 0.001% glucose and 8 μg/mL  
234 histidine. We then incubated them for 24 hours at 30C and 50% humidity with shaking at 250  
235 rpm (5 mL of culture in 50 mL Falcon tubes). The first day of the experiment we determined the  
236 fraction of each strain in each co-culture with flow cytometry, and mixed different co-cultures in  
237 order to achieve the desired starting fraction of producers for the experiment. This procedure  
238 ensured that the cells started in a physiological state characteristic of the co-culture of the two  
239 strains.

240 Experiments were performed in flat-bottom 96-well plates, with 200 μL of medium per well  
241 (YNB + CSM-his + 2% sucrose + 0.001% glucose + 8 μg/mL histidine). Plates were covered  
242 with Parafilm (Bemis Flexible Packaging, Neenah, WI, USA) to limit evaporation, and incubated

---

<sup>1</sup> YPD agar plates: Teknova, Hollister, CA, USA; cat. no. Y1030

<sup>2</sup> YNB+Nitrogen: Sunrise Science, CA, USA; cat no. 1501-250

<sup>3</sup> CSM: Sunrise Science, CA, USA; cat no. 1001-100

<sup>4</sup> Glucose: Sigma-Aldrich/Millipore Sigma, St Louis, MO, USA; cat. no. G8270-1KG

<sup>5</sup> Histidine: Sigma-Aldrich/Millipore Sigma, St Louis, MO, USA; cat. no. 53319-25G

<sup>6</sup> Sucrose: Macron Fine Chemicals; cat. no. 8360-06



243 for 23 hours at 30C and 50% humidity with 800 rpm shaking. After every incubation period,  
244 cells were diluted in fresh medium by the corresponding dilution factor, and migration was  
245 performed following the scheme described in the main text. Dilution and migration were  
246 performed at room temperature (~23C) and using two intermediate plates, to prevent pipeting of  
247 small volumes and ensure accurate dilutions.

248

### 249 Measurements

250 Total density of every subpopulation was measured at the end of each growth cycle by  
251 measuring the optical density at 600 nm in a plate reader (Varioskan Flash, Thermo Fisher  
252 Scientific). Fraction of producers was also determined at the end of each growth cycle by flow  
253 cytometry (Macs Quant VYB, Miltenyi Biotec, Bergisch Gladbach, Germany).

254

### 255 Model

256 We simulated the system using a model that reproduces the discrete cycles of the  
257 experiment: The populations grow during each cycle governed by the equations shown in Fig.  
258 2C (we used Matlab's function ode45 to solve the differential equations numerically). Then, all  
259 populations are divided by the dilution rate, and migration is performed as detailed in Fig. 1B.  
260 Then the next growth cycle is simulated.

261 To determine the model's parameters, we experimentally determined the parameters  $r=0.5$   
262  $h^{-1}$  and  $K=90000$  cells/ $\mu$  L. From previous works we know that  $c<0.1$ ,  $\varepsilon \approx k_M$  and that the lag  
263 phase of yeast should be between 1 and 4 hours (44). Within these constraints, we manually  
264 fitted the exact values of  $c$ ,  $\varepsilon$  and the growth cycle duration to reproduce the trends shown in Fig.  
265 2, as well as the collapse dilution rates shown in Fig. 3. We found a good agreement for  $c=0.07$ ,  
266  $\varepsilon = 14$  cells/ $\mu$  L,  $k_M = 26$  cells/ $\mu$  L and a growth cycle of 22 hours (i.e. a lag phase of 1 hour).  
267 A more detailed fit was unnecessary, given that this simple phenomenological model does not  
268 capture the quantitative details of the system.

269 Note that  $\varepsilon$  is in units of the density of producer cells that should exist in the culture to  
270 bring the concentration of public good to a level that matches the amount that each producer cell  
271 keeps for itself.

272 To perform the resilience tests, we first let the metacommunity reach a stable state. If this  
273 stable state presented oscillations (see **Fig. S2**), we chose a cycle in which population density  
274 was minimum (given that we expect the metacommunity to be least resilient at this point). Then  
275 we perturbed the metacommunity during a single cycle, either by imposing an additional dilution  
276 factor  $\Delta D$  (so for one cycle the dilution factor was  $D'=D*\Delta D$ ), or by reducing the growth rate by  
277  $\Delta r$  (so for one cycle the growth rate was  $r'=r-\Delta r$ ). After the perturbation cycle all parameters  
278 went back to normal, and the simulation continued until the metapopulation either recovered or  
279 went extinct.

280

### 281 **References:**

- 282 1. L. K. Bay, M. J. M. Caley, R. H. Crozier, Meta-population structure in a coral reef fish  
283 demonstrated by genetic data on patterns of migration, extinction and re-colonisation.  
284 *BMC Evol. Biol.* **8**, 248 (2008).
- 285 2. J. B. Dunham, B. E. Rieman, Metapopulation structure of Bull Trout: Influence of

- 286 Physical, Biotic and Geometrical Landscape Characteristics. *Ecol. Appl.* **9**, 642–655  
287 (1999).
- 288 3. M. A. Fortuna, C. Gómez-Rodríguez, J. Bascompte, Spatial network structure and  
289 amphibian persistence in stochastic environments. *Proc. R. Soc. London B Biol. Sci.* **273**,  
290 1429–1434 (2006).
- 291 4. S. P. Ojanen, M. Nieminen, E. Meyke, J. Pöyry, I. Hanski, Long-term metapopulation  
292 study of the Glanville fritillary butterfly (*Melitaea cinxia*): Survey methods, data  
293 management, and long-term population trends. *Ecol. Evol.* **3**, 3713–3737 (2013).
- 294 5. I. Hanski, Metapopulation dynamics. *Nature.* **396**, 41–49 (1998).
- 295 6. O. E. G. Ilkka A. Hanski, *Ecology, Genetics and Evolution of Metapopulations* (2004).
- 296 7. M. A. Leibold *et al.*, The metacommunity concept: A framework for multi-scale  
297 community ecology. *Ecol. Lett.* **7**, 601–613 (2004).
- 298 8. F. Carrara, F. Altermatt, I. Rodriguez-Iturbe, A. Rinaldo, Dendritic connectivity controls  
299 biodiversity patterns in experimental metacommunities. *Proc. Natl. Acad. Sci.* **109**, 5761–  
300 5766 (2012).
- 301 9. E. H. Campbell Grant, W. H. Lowe, W. F. Fagan, Living in the branches: Population  
302 dynamics and ecological processes in dendritic networks. *Ecol. Lett.* **10**, 165–175 (2007).
- 303 10. M. B. Morrissey, D. T. De Kerckhove, The Maintenance of Genetic Variation Due to  
304 Asymmetric Gene Flow in Dendritic Metapopulations. *Am. Nat.* **174**, 875–889 (2009).
- 305 11. L. Kuglerová, R. Jansson, Local and regional processes determine plant species richness  
306 in a river-network metacommunity. *Ecology.* **96**, 381–391 (2016).
- 307 12. E. Göthe, D. G. Angeler, L. Sandin, Metacommunity structure in a small boreal stream  
308 network. *J. Anim. Ecol.* **82**, 449–458 (2013).
- 309 13. B. L. Brown, C. M. Swan, Dendritic network structure constrains metacommunity  
310 properties in riverine ecosystems. *J. Anim. Ecol.* **79**, 571–580 (2010).
- 311 14. J. Liu, J. Soininen, B. P. Han, S. A. J. Declerck, Effects of connectivity, dispersal  
312 directionality and functional traits on the metacommunity structure of river benthic  
313 diatoms. *J. Biogeogr.* **40**, 2238–2248 (2013).
- 314 15. F. Altermatt, Diversity in riverine metacommunities: A network perspective. *Aquat. Ecol.*  
315 **47**, 365–377 (2013).
- 316 16. J. R. Watson *et al.*, Identifying critical regions in small-world marine metapopulations.  
317 *Proc. Natl. Acad. Sci. U. S. A.* **108**, E907-13 (2011).
- 318 17. A. F. Rozenfeld *et al.*, Network analysis identifies weak and strong links in a  
319 metapopulation system. *Proc. Natl. Acad. Sci.* **105**, 18824–18829 (2008).
- 320 18. M. Seymour, E. A. Fronhofer, F. Altermatt, Dendritic network structure and dispersal  
321 affect temporal dynamics of diversity and species persistence. *Oikos.* **124**, 908–916  
322 (2015).
- 323 19. G. Livingston *et al.*, Competition–colonization dynamics in experimental bacterial  
324 metacommunities. *Nat. Commun.* **3**, 1234 (2012).

- 325 20. C. C. Jaworski, C. Thébaud, J. Chave, Dynamics and persistence in a metacommunity  
326 centred on the plant *Antirrhinum majus*: Theoretical predictions and an empirical test. *J.*  
327 *Ecol.* **104**, 456–468 (2016).
- 328 21. Y. Salomon, S. R. Connolly, L. Bode, Effects of asymmetric dispersal on the coexistence  
329 of competing species. *Ecol. Lett.* **13**, 432–441 (2010).
- 330 22. M. Bode, L. Bode, P. R. Armsworth, Different dispersal abilities allow reef fish to coexist.  
331 *Proc. Natl. Acad. Sci.* **108**, 16317–16321 (2011).
- 332 23. F. Altermatt, S. Schreiber, M. Holyoak, Interactive effects of disturbance and dispersal  
333 directionality on species richness and composition in metacommunities. *Ecology.* **92**, 859–  
334 870 (2011).
- 335 24. F. C. Santos, M. D. Santos, J. M. Pacheco, Social diversity promotes the emergence of  
336 cooperation in public goods games. *Nature.* **454**, 213–6 (2008).
- 337 25. M. A. Nowak, Five rules for the evolution of cooperation. *Science.* **314**, 1560–1563  
338 (2006).
- 339 26. B. Momeni, A. J. Waite, W. Shou, Spatial self-organization favors heterotypic cooperation  
340 over cheating. *Elife.* **2013**, 1–18 (2013).
- 341 27. Y. Artzy-Randrup, L. Stone, Connectivity, cycles, and persistence thresholds in  
342 metapopulation networks. *PLoS Comput. Biol.* **6** (2010),  
343 doi:10.1371/journal.pcbi.1000876.
- 344 28. L. Mari, R. Casagrandi, E. Bertuzzo, A. Rinaldo, M. Gatto, Metapopulation persistence  
345 and species spread in river networks. *Ecol. Lett.* **17**, 426–434 (2014).
- 346 29. A. Eklof, L. Kaneryd, P. Munger, Climate change in metacommunities: dispersal gives  
347 double-sided effects on persistence. *Philos. Trans. R. Soc. B Biol. Sci.* **367**, 2945–2954  
348 (2012).
- 349 30. S. Wang, B. Haegeman, M. Loreau, Dispersal and metapopulation stability. *PeerJ.* **3**,  
350 e1295 (2015).
- 351 31. S. Vuilleumier, B. M. Bolker, O. Lévêque Olivier, Effects of colonization asymmetries on  
352 metapopulation persistence. *Theor. Popul. Biol.* **78**, 225–238 (2010).
- 353 32. M. Bode, K. Burrage, H. P. Possingham, Using complex network metrics to predict the  
354 persistence of metapopulations with asymmetric connectivity patterns. *Ecol. Modell.* **214**,  
355 201–209 (2008).
- 356 33. A. Hastings, L. W. Botsford, Persistence of spatial populations depends on returning  
357 home. *Proc. Natl. Acad. Sci.* **103**, 6067–6072 (2006).
- 358 34. M. Scheffer, S. Carpenter, J. a Foley, C. Folke, B. Walker, Catastrophic shifts in  
359 ecosystems. *Nature.* **413**, 591–596 (2001).
- 360 35. L. Dai, D. Vorselen, K. S. Korolev, J. Gore, Generic indicators for loss of resilience  
361 before a tipping point leading to population collapse. *Science (80-. ).* **336**, 1175–1177  
362 (2012).
- 363 36. A. Chen, A. Sanchez, L. Dai, J. Gore, Dynamics of a producer-free-loader ecosystem on  
364 the brink of collapse. *Nat. Commun.* **5**, 3713 (2014).

- 365 37. A. Veraart *et al.*, Recovery rates reflect distance to a tipping point in a living system.  
366 *Nature*. **481**, 357–360 (2012).
- 367 38. L. Dai, K. S. Korolev, J. Gore, Slower recovery in space before collapse of connected  
368 populations. *Nature*. **496**, 355–8 (2013).
- 369 39. M. Scheffer *et al.*, Early-warning signals for critical transitions. *Nature*. **461**, 53–59  
370 (2009).
- 371 40. L. J. Gilarranz, J. Bascompte, Spatial network structure and metapopulation persistence. *J.*  
372 *Theor. Biol.* **297**, 11–16 (2012).
- 373 41. I. Hanski, O. Ovaskainen, The metapopulation capacity of a fragmented landscape.  
374 *Nature*. **404**, 755–758 (2000).
- 375 42. J. E. Keymer, P. A. Marquet, J. X. Velasco-herna, S. A. Levin, Extinction Thresholds and  
376 Metapopulation Persistence in Dynamic Landscapes. *Am. Nat.* **156**, 478–494 (2000).
- 377 43. A. Shmida, M. V. Wilson, Biological Determinants of Species Diversity. *J. Biogeogr.* **12**,  
378 1 (1985).
- 379 44. J. Gore, H. Youk, A. van Oudenaarden, Snowdrift game dynamics and facultative  
380 cheating in yeast. *Nature*. **459**, 253–256 (2009).
- 381 45. D. Greig, M. Travisano, The Prisoner’s Dilemma and polymorphism in yeast SUC genes.  
382 *Proc Biol Sci.* **271 Suppl**, S25–6 (2004).
- 383 46. A. Sanchez, J. Gore, Feedback between Population and Evolutionary Dynamics  
384 Determines the Fate of Social Microbial Populations. *PLoS Biol.* **11** (2013),  
385 doi:10.1371/journal.pbio.1001547.
- 386 47. V. Colizza, R. Pastor-Satorras, A. Vespignani, Reaction–diffusion processes and  
387 metapopulation models in heterogeneous networks. *Nat. Phys.* **3**, 276–282 (2007).
- 388 48. M. A. Nowak, *Evolutionary Dynamics* (Harvard University Press, 2006).
- 389 49. A.-L. Barabási, R. Albert, Emergence of Scaling in Random Networks. *Science (80-. )*.  
390 **286**, 509–512 (1999).

391

392 **Acknowledgments:** We are grateful for useful discussions with Kirill S. Korolev, the members  
393 of the Gore lab and the members of the Barabási Lab. This work was supported by the  
394 DARPA BRICS program (Program Code: TRS-01 under Contract No. HR0011-15-C-  
395 0091), NIH New Innovator Award (DP2 AG044279), NSF CAREER Award (PHY-  
396 1055154), a Sloan Research Fellowship (BR2011-066), the Pew Scholars Program (2010-  
397 000224-007), the Paul Allen Family Foundation, an EMBO Postdoctoral Fellowship  
398 (Grant ALTF 818-2014), a Human Frontier Science Foundation Postdoctoral Fellowship  
399 (Grant LT000537/2015), NSFC (Grants No. 61375120 and No. 61533001), China  
400 Scholarship Council (No. 201406010195).

401

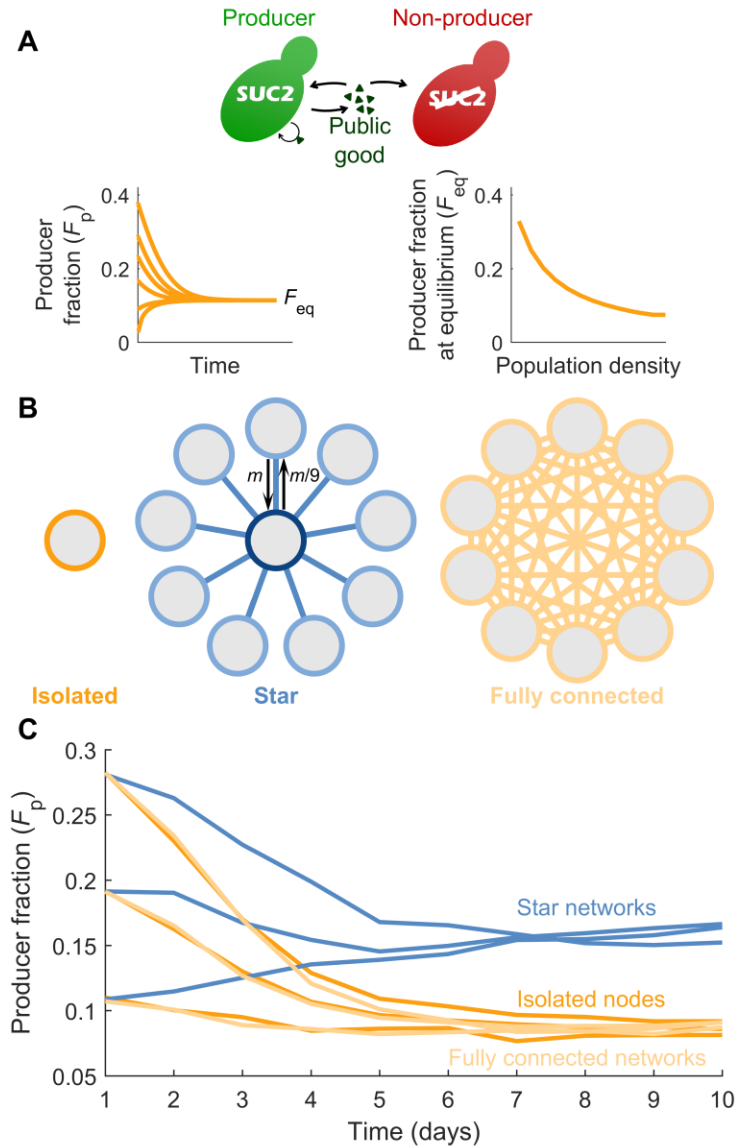

402

403 **Figure 1. Heterogeneous metacommunity structure increases the fraction of producers.** (A)  
 404 Schematic of the public-goods game. Producers (green) produce a public good (triangles),  
 405 keeping a small fraction (~1%) for themselves and releasing the rest, which also benefits non-  
 406 non-producers (red). **Left inset:** Illustration of the time evolution of the fraction of producers ( $F_C$ ) in  
 407 a well-mixed population. **Right inset:** Illustration of the dependency of the equilibrium fraction  
 408 of producers ( $F_{C,eq}$ ) on the density of a well-mixed population. Both illustrations were computed  
 409 using the model in Fig. 2. (B) Migration scheme for isolated nodes (no migration), star networks  
 410 (all side nodes send a fraction  $m$  of migrants towards the central node, which in turn sends a  
 411 fraction  $m/9$  towards each side node), and fully connected networks (every node sends a fraction  
 412  $m/9$  of migrants towards each other node). (C) Experimental results showing the fraction of  
 413 producers (computed as total number of producers over total number of cells for the whole  
 414 network) as a function of time for the three network topologies, starting from three initial  
 415 conditions. Each line corresponds to one 10-node network (or 10 isolated nodes).  
 416

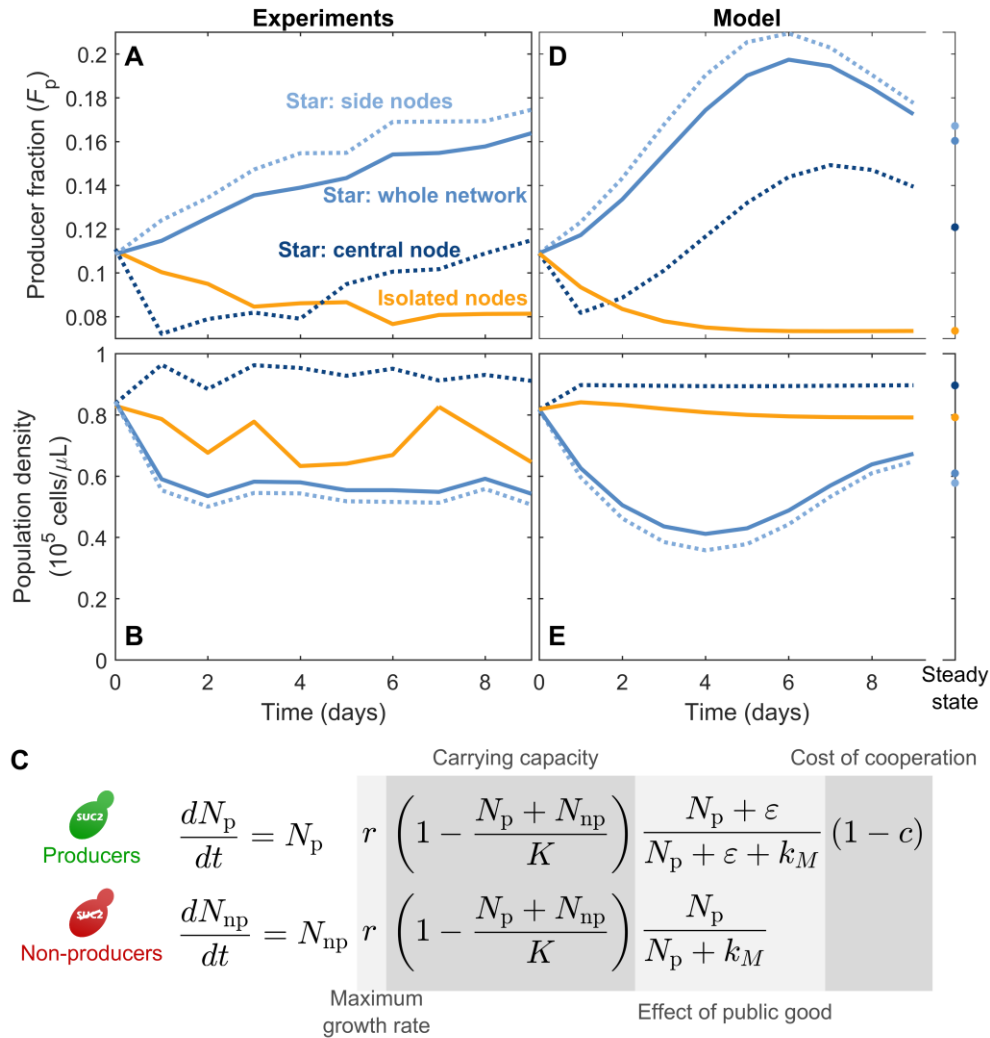

417

418 **Figure 2. The increase in producer fraction in all nodes of a star network is captured by a**  
 419 **simple phenomenological model. (A)** Experimental results showing the time evolution of the  
 420 fraction of producers in the star network on average (solid blue line), each type of node within  
 421 the star network (dashed dark blue line for central nodes and dashed light blue line for side  
 422 nodes) and in an isolated population (yellow line). **(B)** Same as (a), but for the total density of  
 423 cells. **(C)** Equations the phenomenological model.  $N_p$ ,  $N_{np}$  are the densities of producers and non-  
 424 producers, respectively (in cells/  $\mu$  L);  $r$  is the maximum growth rate;  $K$  is the carrying capacity  
 425 (common for both strains);  $\varepsilon$  corresponds to the amount of enzyme imported by producers  
 426 before the rest diffuses away (expressed in units of equivalent producer cells/  $\mu$  L, see Methods);  
 427  $k_M$  is the amount of producers needed to produce enough enzyme to bring the growth of non-  
 428 producers to half its maximum value;  $c$  is the cost of producing the public good. Model  
 429 parameters:  $r=0.5 \text{ h}^{-1}$ ,  $K=90000 \text{ cells}/\mu \text{ L}$ ,  $c=0.07$ ,  $\varepsilon = 14 \text{ cells}/\mu \text{ L}$ ,  $k_M = 26 \text{ cells}/\mu \text{ L}$ , growth  
 430 cycle 22 hours, dilution factor 650 and migration rate  $m=0.6$  per cycle ( $\sim 0.06$  per generation).  
 431 **(D)** Same as (a), but as predicted by the model (points show the steady state after 100 cycles).  
 432 **(E)** Same as (b), but as predicted by the model.

433



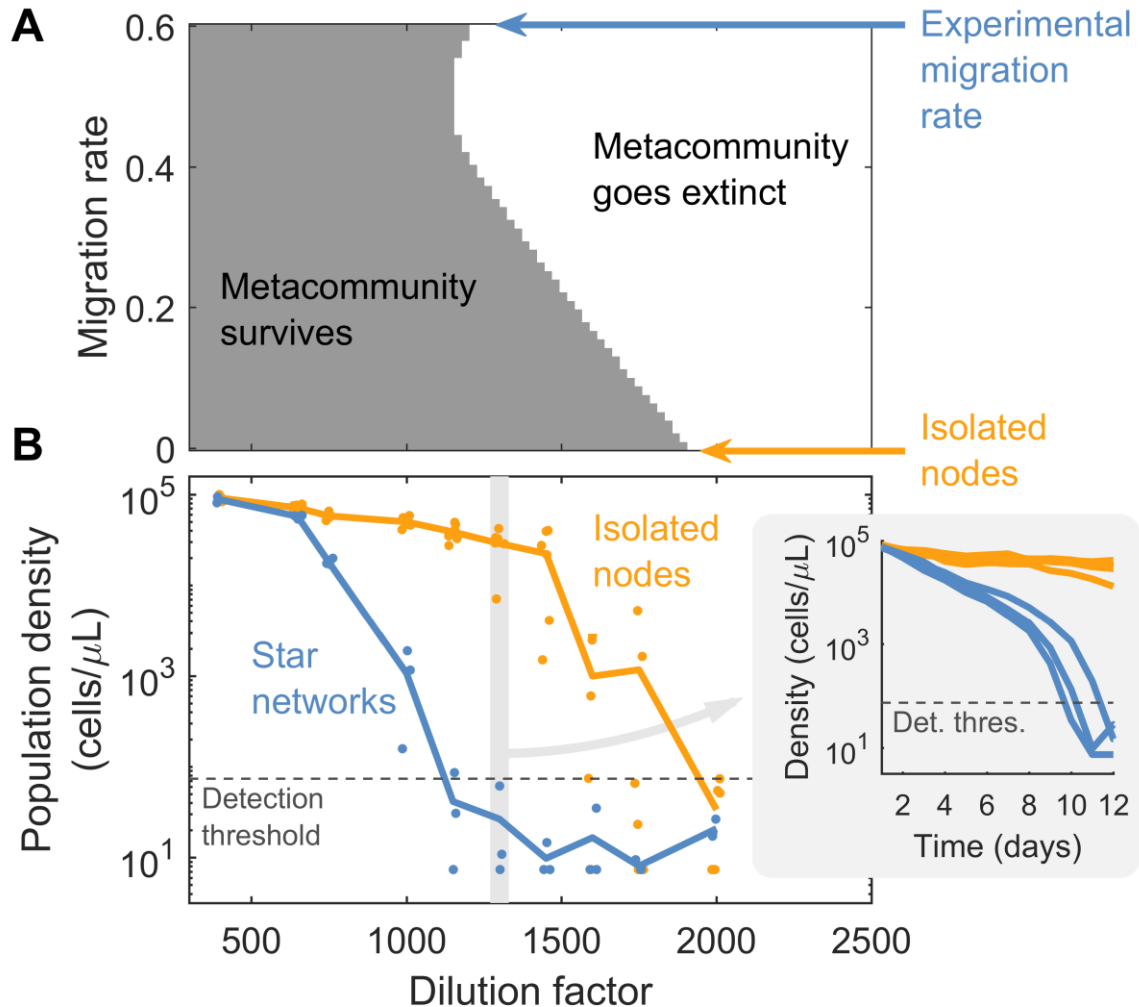

434

435 **Figure 3. Heterogeneous metapopulations are less able to survive challenging environments**  
436 **than isolated populations.** (A) The grey area indicates the conditions (dilution factor and  
437 migration rate) in which the model predicts that a 10-node star network will survive after 1000  
438 growth/dilution/migration cycles (note that  $m = 0$  is also equivalent to isolated nodes). The rest  
439 of model parameters are the same as in Fig. 2. (B) Experimental equilibrium population densities  
440 for 10-nodes star networks (blue) and isolated nodes (yellow), as a function of dilution factor.  
441 Each dot is either an individual network or a set of 10 isolated nodes; lines are the average.  
442 **Inset:** Experimental time series of population densities for dilution factor 1300, for star networks  
443 (blue) and isolated nodes (yellow). See **Supplementary Figure S1** for the complete time series.  
444



445

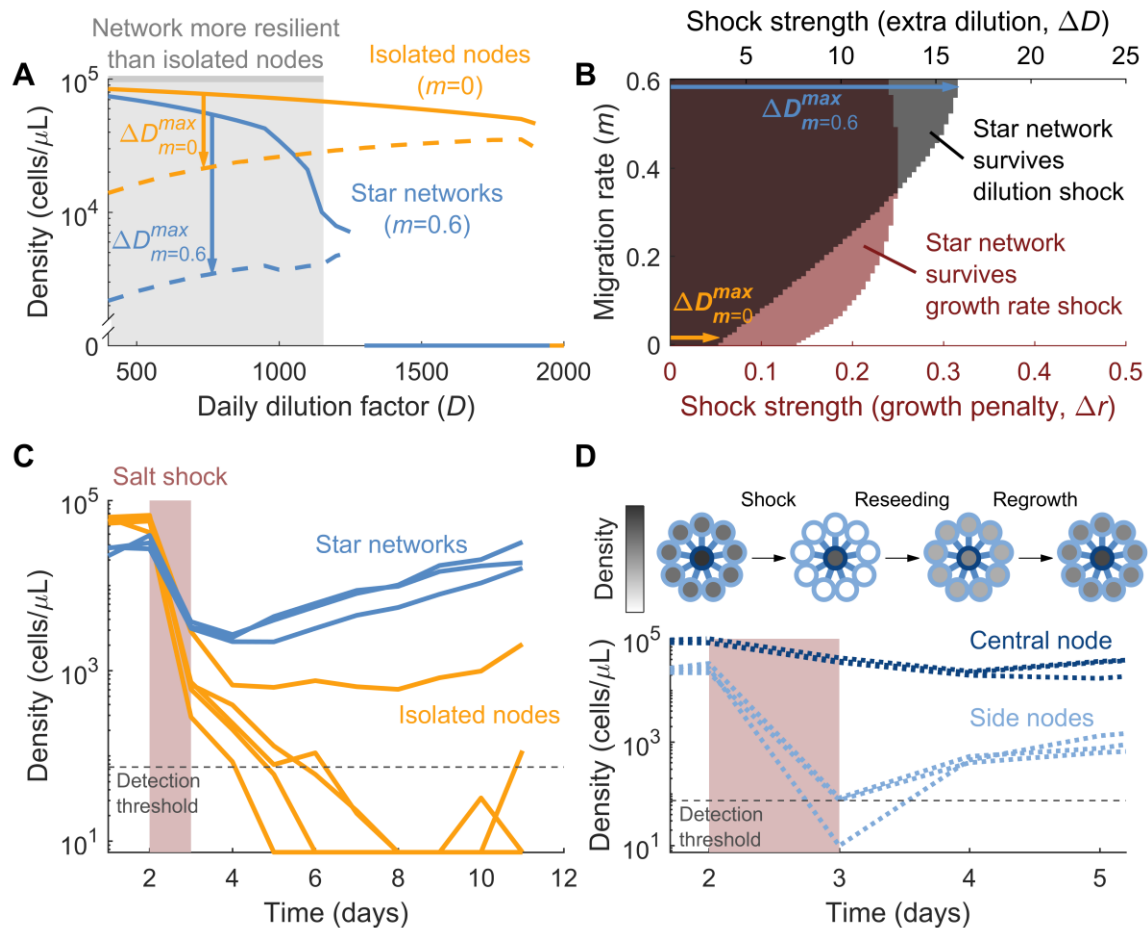

446

447 **Figure 4. Star networks are more resilient to perturbations than isolated populations. (A)**  
 448 Bifurcation diagram for the metacommunity. Solid lines show the average population density in  
 449 equilibrium as a function of dilution rate (yellow: isolated nodes; blue: 10-node star network).  
 450 Dashed lines show the minimum density from which the metapopulation can recover. Arrows  
 451 show the maximum dilution shock that each metapopulation can withstand ( $\Delta D^{max}$ ), when daily  
 452 dilution rate is  $D=750$ . Grey area marks the region where the star network can withstand a  
 453 greater shock than the isolated nodes. Model parameters are as in Fig. 2. See **Supplementary**  
 454 **Figure S2** for a more detailed version of this figure. **(B)** Model prediction for survival of a 10-  
 455 node star network with daily dilution factor  $D=750$  after a perturbation, as a function of  
 456 perturbation strength and migration rate. Rest of parameters are as in Fig. 2. **Black:** Shock  
 457 corresponds to one cycle with increased dilution factor,  $D'=750*\Delta D$ . **Red:** Shock corresponds to  
 458 one cycle with reduced growth  $r'=0.5-\Delta r$ . **(C)** Experimental results showing the time evolution  
 459 of the average density in star networks (blue) and isolated populations (yellow). Each line  
 460 corresponds to one 10-node network or to 10 isolated nodes. All populations are subject to a 750  
 461 dilution factor and are initially in equilibrium. They are then perturbed by a salt shock (32g/L  
 462 concentration of NaCl, shaded in red). **(D) Top:** Cartoon of star network recovering from a  
 463 perturbation. Grayscale indicates population density in every node. **Bottom:** Same as (B), but  
 464 only for the star network and separating the center and side nodes.

465 **Supplementary Figures:**  
466  
467

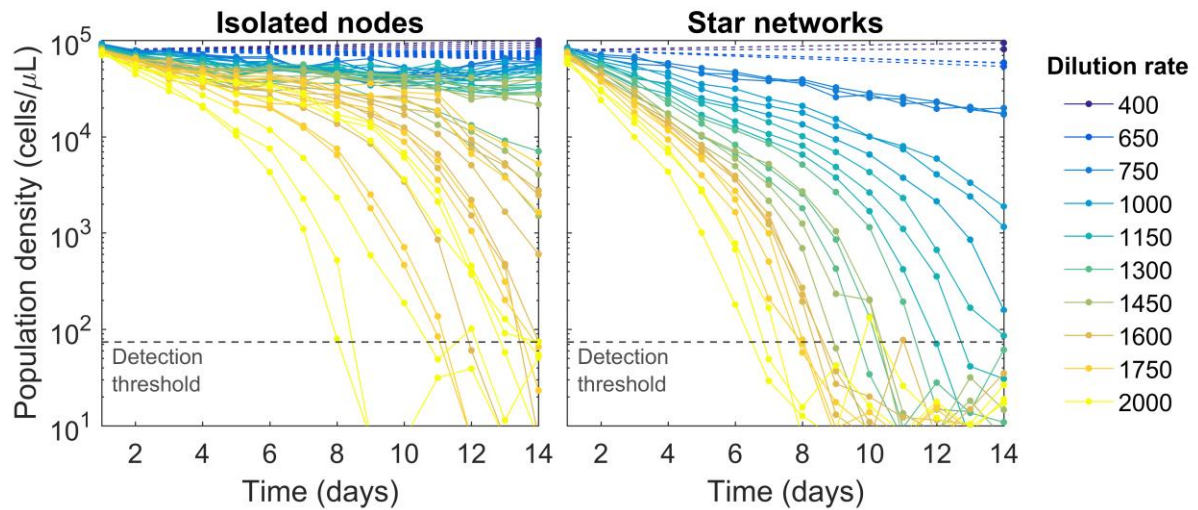

468 **Figure S1. Time series show that star networks collapse at lower dilution rates than**  
469 **isolated nodes. Left:** Population density over time for isolated nodes at different dilution rates.  
470 Dashed lines indicate cases in which only initial and final densities were measured. Data at 14  
471 days correspond to the points shown in main text **Figure 3B. Right:** Same as (Left), but for star  
472 network (population density is averaged across each network).  
473  
474

475

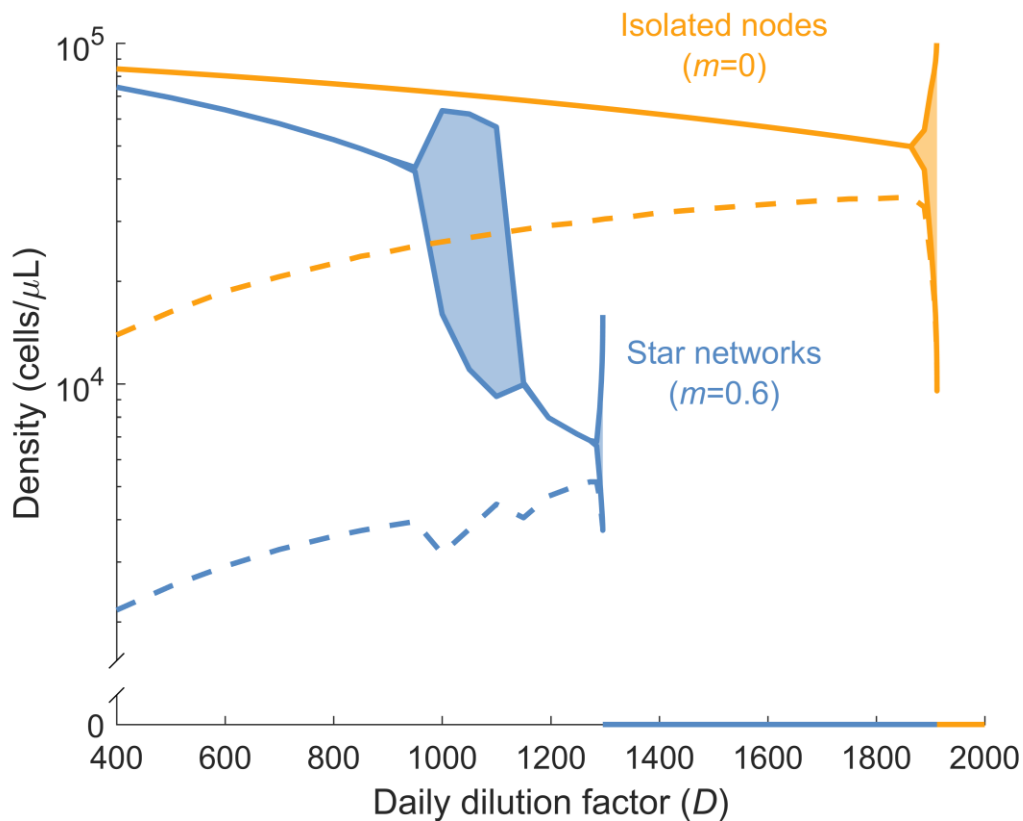

476  
477  
478  
479  
480  
481  
482  
483  
484  
485  
486

**Figure S2. Bifurcation diagram for the metacommunity, accounting for oscillatory states.**

Solid lines show the average population density in equilibrium as a function of dilution rate (yellow: isolated nodes; blue: 10-node star network). For some dilution factors the system reaches a limit cycle, presenting stable oscillations. These cases are represented by a shaded patch, the top line corresponding to the peak population density and the bottom line corresponding to the valley population density. Dashed lines show the minimum density from which the metapopulation can recover (assuming same producer frequencies and same relative densities between center and side nodes as the population in equilibrium; when oscillations are present, we took the population at the lowest point of the cycle as a reference). Model parameters are as in Fig. 2.
